# Supplementary material for: Biocontrol efficacy of Bacillus licheniformis and Bacillus amyloliquefaciens against rice pathogens
Source: PeerJ. 2025 Jan 29;13:e18920. doi: 10.7717/peerj.18920 (PMC11786712; doi:10.7717/peerj.18920)
Supplement: Supplemental Information 3 [file peerj-13-18920-s003.xlsx]

## Sheet: Pathogen inhibition
																Table 2. Inhibition of Xanthomonas oryzae and Bipolaris oryzae by rice root-associated bacteria
													Xanthomonas oryzae
											Isolates	FR1	FR2	FR3	FR5	FR6	FR8	FR10	FR11	FR17	FE6	FE10	FE11	LR5	LR8	LR13	LR15	LR17	LR21	LR22	LR23	LR26	LR28	LR31	LR35	LE4	LE5	LE7	LE17	PR2	PR3	PR7	PR8	PR10	PE2	PE3	PE7
											R1	64	62.3	0	66.5	42.5	74.4	18.2	42.6	43.2	30.2	0	42.5	47.5	32.6	52.4	42.3	50.2	20.5	72.3	37.6	52.1	67.2	42.1	41	47.4	32.4	82.2	42.3	52.1	55.2	15.6	10.8	52.1	72	19.6	10.4
											R2	56.8	51.8	0	51.5	44.3	65.6	15.6	45.2	46.7	34.7	0	47.2	44.7	36.4	54.6	40.1	48.3	18.5	65.2	34.5	54.8	63.1	37.6	36	39.3	37.8	78.4	58.3	47.3	53.8	19.4	12.6	57.3	69.6	23.2	14.5
											R3	53.6	64	0	57.8	40.1	66.4	19.2	38.6	40.6	37.2	0	40	46	28.5	51.8	37.4	45.8	22.3	69.2	28.3	48.3	54.2	45.2	42	44.5	28	75.8	54.2	44.2	48.5	17	13.2	50.5	66.4	21.2	19.2
											Mean	58.1333	59.3667	0	58.6	42.3	68.8	17.6667	42.1333	43.5	34.0333	0	43.2333	46.0667	32.5	52.9333	39.9333	48.1	20.4333	68.9	33.4667	51.7333	61.5	41.6333	39.6667	43.7333	32.7333	78.8	51.6	47.8667	52.5	17.3333	12.2	53.3	69.3333	21.3333	14.7
											S.D	6.82444	8.1056	0	9.02971	3.60491	6.36399	3.35609	4.82243	4.55882	5.04508	0	5.15337	2.89897	5.44873	2.972	3.95202	3.70458	3.39865	5.05727	6.2331	4.76325	8.14383	5.31921	4.71233	5.60184	6.40627	4.71647	9.80861	5.47814	5.0319	3.41958	2.74678	5.05305	4.30728	3.30148	5.90118
											S.E	4.82634	5.73239	0	6.38593	2.54944	4.5007	2.37347	3.41049	3.22406	3.56795	0	3.64453	2.05019	3.85341	2.10184	2.79493	2.61993	2.40357	3.57657	4.40814	3.36864	5.75943	3.76182	3.33262	3.9617	4.5306	3.33555	6.93678	3.87422	3.55862	2.41837	1.94256	3.57359	3.04617	2.33485	4.1734
													Bipolaris oryzae
											Isolates	FR1	FR2	FR3	FR5	FR6	FR8	FR10	FR11	FR17	FE6	FE10	FE11	LR5	LR8	LR13	LR15	LR17	LR21	LR22	LR23	LR26	LR28	LR31	LR35	LE4	LE5	LE7	LE17	PR2	PR3	PR7	PR8	PR10	PE2	PE3	PE7
											R1	58.7	74.3	0	48.1	50.8	1.3	7.6	65.5	0	0	0	66.5	44.2	64	68.3	65.2	0	58.4	87.2	23.7	47.4	0	0	81	37.7	16.3	74.5	67.4	35.5	53.7	2.3	53.6	45.5	52.2	67.5	0
											R2	53.5	71.5	0	44.7	46.2	1	5.2	60.2	0	0	0	60.3	41.5	58.2	64	60.5	0	52.7	82.3	20	44.8	0	0	71.3	31.5	13.7	70.3	64.3	33.8	48.2	3.4	48.4	42.3	46.6	63.8	0
											R3	47.2	66.8	0	41.6	39.5	2.5	4.6	56.8	0	0	0	57.4	37.6	56	61.5	55.2	0	45.5	75	18.8	41.3	0	0	68.2	28.4	9	68.6	58.3	28	45.5	1.2	42.5	34.7	40.5	60.2	0
											Mean	53.1333	70.8667	0	44.8	45.5	1.6	5.8	60.8333	0	0	0	61.4	41.1	59.4	64.6	60.3	0	52.2	81.5	20.8333	44.5	0	0	73.5	32.5333	13	71.1333	63.3333	32.4333	49.1333	2.3	48.1667	40.8333	46.4333	63.8333	0
											S.D	5.75876	3.7899	0	3.25115	5.68243	0.793725	1.58745	4.38444	0	0	0	4.64866	3.31813	4.1328	3.43948	5.003	0	6.46452	6.13922	2.55408	3.06105	0	0	6.67757	4.73533	3.7	3.03699	4.62637	3.93234	4.17892	1.1	5.55368	5.54737	5.85178	3.65011	0
											S.E	4.07206	2.67986	0	2.29891	4.01808	0.561249	1.1225	3.10027	0	0	0	3.2871	2.34627	2.92233	2.43208	3.53765	0	4.5711	4.34108	1.80601	2.16449	0	0	4.72176	3.34838	2.6163	2.14748	3.27134	2.78059	2.95494	0.777817	3.92704	3.92258	4.13783	2.58102	0
